# Supplementary material for: Maternal Acylcarnitine Disruption as a Potential Predictor of Preterm Birth in Primigravida: A Preliminary Investigation
Source: MDPI journal article supplement (doi:10.3390/nu16050595), 2024-02-22
Supplement: s1 [file s1]

**Table S1: Annotated Metabolites**

| <b>Metabolites with VIP&gt;1</b>      | <b>Fold<br/>Change<sup>1</sup></b> | <b>p-value</b> | <b>FDR<br/>q-value at 15%</b> | <b>VIP Score</b> |
|---------------------------------------|------------------------------------|----------------|-------------------------------|------------------|
| Dopamine                              | 1.533                              | <b>0.0013</b>  | <b>0.0905</b>                 | 1.230            |
| Butenylcarnitine (C4:1)               | 2.093                              | <b>0.0015</b>  | <b>0.0905</b>                 | 2.272            |
| Tyrosine                              | 1.447                              | <b>0.0015</b>  | <b>0.0905</b>                 | 1.200            |
| Decadienoylcarnitine (C10:2)          | 1.482                              | <b>0.0023</b>  | <b>0.1041</b>                 | 1.141            |
| Threonylthreonine                     | 1.478                              | <b>0.0032</b>  | <b>0.1072</b>                 | 1.250            |
| Dodec-enedioylcarnitine (C12:1-DC)    | 1.461                              | <b>0.0037</b>  | <b>0.1072</b>                 | 1.311            |
| Glutaminyllysine                      | 1.572                              | <b>0.0051</b>  | <b>0.1072</b>                 | 1.257            |
| Undeca-trienoylcarnitine (C11:3)      | 1.510                              | <b>0.0055</b>  | <b>0.1072</b>                 | 1.564            |
| Acetyl-L-arginine                     | 1.386                              | <b>0.0061</b>  | <b>0.1072</b>                 | 1.231            |
| Propenoylcarnitine (C3:1)             | 1.438                              | <b>0.0065</b>  | <b>0.1072</b>                 | 1.257            |
| Octenoylcarnitine (C8:1)              | 1.328                              | <b>0.0067</b>  | <b>0.1072</b>                 | 1.045            |
| Hept enoylcarnitine (C7:1)            | 1.479                              | <b>0.0074</b>  | <b>0.1072</b>                 | 1.439            |
| Hydroxydecanoylcarnitine (C10:0-OH)   | 1.505                              | <b>0.0077</b>  | <b>0.1072</b>                 | 1.178            |
| Hydroxyundecanoylcarnitine (C11:0-OH) | 1.483                              | <b>0.0099</b>  | <b>0.1207</b>                 | 0.897            |
| Methylhexanoylcarnitine (C6:0 M)      | 1.350                              | <b>0.0100</b>  | <b>0.1207</b>                 | 1.301            |
| Alanine                               | 1.465                              | <b>0.0108</b>  | <b>0.1214</b>                 | 1.546            |
| Methyloctanoylcarnitine (C8:0 M)      | 1.448                              | <b>0.0114</b>  | <b>0.1214</b>                 | 1.443            |
| Hydroxydodecanoylcarnitine (C12:0-OH) | 1.408                              | <b>0.0151</b>  | 0.1518                        | 0.921            |
| Threonylphenylalanine                 | 1.609                              | <b>0.0194</b>  | 0.1848                        | 1.153            |
| Hydroxyestradiol                      | -2.033                             | <b>0.0237</b>  | 0.2051                        | 1.606            |
| Phenylalanine                         | 1.456                              | <b>0.0238</b>  | 0.2051                        | 1.145            |
| Undec-enoylcarnitine (C11:1)          | 1.411                              | <b>0.0268</b>  | 0.2205                        | 0.819            |
| Octadienoylglycine                    | 1.408                              | <b>0.0287</b>  | 0.2240                        | 0.844            |
| Paraxanthine                          | 2.463                              | <b>0.0297</b>  | 0.2240                        | 2.147            |

| <b>Metabolites with VIP&gt;1</b>             | <b>Fold<br/>Change<sup>1</sup></b> | <b>p-value</b> | <b>FDR<br/>q-value at 15%</b> | <b>VIP Score</b> |
|----------------------------------------------|------------------------------------|----------------|-------------------------------|------------------|
| Lysylasparagine                              | 1.312                              | <b>0.0354</b>  | 0.2534                        | 1.295            |
| Aspartyl-Valine                              | 1.376                              | <b>0.0378</b>  | 0.2534                        | 0.728            |
| Methyldecanoylcarnitine (C10:0 M)            | 1.435                              | <b>0.0381</b>  | 0.2534                        | 0.862            |
| Glutamylserine                               | 1.247                              | <b>0.0392</b>  | 0.2534                        | 0.729            |
| Non-enedioylcarnitine (C9:1-DC)              | 1.283                              | <b>0.0434</b>  | 0.2709                        | 1.481            |
| Epinephrine                                  | 1.426                              | 0.0575         | 0.3469                        | 0.761            |
| Methylpentanoylcarnitine (C5:1 M)            | 1.439                              | 0.0648         | 0.3783                        | 1.285            |
| Hydroxytrtradeca-dienoylcarnitine (C14:2-OH) | 1.455                              | 0.0677         | 0.3829                        | 0.665            |
| Hydroxypentanoylcarnitine (C5:0-OH)          | 1.344                              | 0.0743         | 0.3939                        | 0.852            |
| Aspartylphenylalanine                        | 1.772                              | 0.0826         | 0.3939                        | 1.066            |
| Leucyl-Cysteine                              | 1.241                              | 0.0836         | 0.3939                        | 1.325            |
| Norepinephrine                               | 1.233                              | 0.0857         | 0.3939                        | 0.966            |
| Lysylmethionine                              | 1.274                              | 0.0873         | 0.3939                        | 1.149            |
| Nona-dienoylcarnitine (C9:2)                 | 1.248                              | 0.0877         | 0.3939                        | 0.696            |
| Oct-enedioylcarnitine (C8:1-DC)              | 1.245                              | 0.0891         | 0.3939                        | 0.808            |
| Threonylasparagine                           | 1.208                              | 0.0895         | 0.3939                        | 1.299            |
| Asp-Gly-Lys                                  | 1.371                              | 0.0913         | 0.3939                        | 0.769            |
| Glutaminylcysteine                           | 1.344                              | 0.0914         | 0.3939                        | 1.150            |
| Thymine                                      | -1.132                             | 0.0955         | 0.4020                        | 1.338            |
| L-Carnitine                                  | -1.121                             | 0.1000         | 0.4114                        | 1.604            |
| Tryptophyl-Proline                           | 1.453                              | 0.1074         | 0.4320                        | 0.846            |
| Kynurenic acid                               | 1.446                              | 0.1145         | 0.4479                        | 0.927            |
| Decenoylcarnitine (C10:1)                    | 1.429                              | 0.1212         | 0.4479                        | 1.194            |
| Valine                                       | 1.178                              | 0.1220         | 0.4479                        | 1.005            |

| Metabolites with VIP>1                | Fold<br>Change <sup>1</sup> | <i>p</i> -value | FDR<br><i>q</i> -value at 15% | VIP Score |
|---------------------------------------|-----------------------------|-----------------|-------------------------------|-----------|
| Androsterone                          | 1.238                       | 0.1224          | 0.4479                        | 0.894     |
| Phenylalanyltryptophan                | 1.380                       | 0.1256          | 0.4479                        | 0.788     |
| Tetradecadienoylcarnitine (C14:2)     | 1.284                       | 0.1262          | 0.4479                        | 0.549     |
| Histidylhistidine                     | 1.345                       | 0.1330          | 0.4629                        | 0.658     |
| Glutaminyglutamine                    | 1.256                       | 0.1373          | 0.4689                        | 0.675     |
| Biocytin                              | 1.390                       | 0.1493          | 0.4933                        | 0.792     |
| Xanthine                              | 1.235                       | 0.1499          | 0.4933                        | 0.592     |
| Prolylphenylalanine                   | 1.245                       | 0.1603          | 0.5181                        | 1.358     |
| Threonylproline                       | 1.192                       | 0.1660          | 0.5255                        | 0.761     |
| N-Acetylglutamine                     | 1.207                       | 0.1690          | 0.5255                        | 0.612     |
| Tyramine                              | 1.400                       | 0.1725          | 0.5255                        | 0.638     |
| Dodeca-dienoylcarnitine (C12:2)       | 1.301                       | 0.1755          | 0.5255                        | 1.497     |
| Leucylleucine                         | 1.335                       | 0.1778          | 0.5255                        | 0.667     |
| Threonylalanine                       | 1.298                       | 0.1800          | 0.5255                        | 0.973     |
| Phenylalanylphenylalanine             | 1.307                       | 0.1832          | 0.5263                        | 0.514     |
| 5-Hydroxyoctanoylcarnitine (C10:0-OH) | 1.529                       | 0.1942          | 0.5492                        | 1.313     |
| Acetylcarnitine                       | 1.437                       | 0.2033          | 0.5661                        | 0.737     |
| Glutamylalanine                       | 1.152                       | 0.2097          | 0.5711                        | 1.368     |
| Hexenedioylcarnitine (C6:1-DC)        | 1.264                       | 0.2114          | 0.5711                        | 0.636     |
| Piperidine                            | 1.217                       | 0.2173          | 0.5784                        | 0.700     |
| Hydroxyisovaleric acid                | 1.321                       | 0.2392          | 0.6027                        | 0.754     |
| Glycyl-Aspartate                      | 1.232                       | 0.2412          | 0.6027                        | 1.128     |
| p-Cresol glucuronide                  | 1.302                       | 0.2479          | 0.6027                        | 0.838     |
| Glutamylphenylalanine                 | 1.225                       | 0.2486          | 0.6027                        | 0.670     |
| Leucine                               | 1.248                       | 0.2501          | 0.6027                        | 0.743     |

| Metabolites with VIP>1             | Fold<br>Change <sup>1</sup> | <i>p</i> -value | FDR<br><i>q</i> -value at 15% | VIP Score |
|------------------------------------|-----------------------------|-----------------|-------------------------------|-----------|
| Hydroxyhexanoycarnitine (C6:0-OH)  | 1.396                       | 0.2516          | 0.6027                        | 1.111     |
| p-Cresol                           | 1.162                       | 0.2557          | 0.6027                        | 0.647     |
| Asparaginyglycine                  | 1.303                       | 0.2623          | 0.6027                        | 0.910     |
| Uric acid                          | -1.109                      | 0.2664          | 0.6027                        | 1.464     |
| Octenoylglycine                    | 1.229                       | 0.2686          | 0.6027                        | 0.604     |
| DL-Dopa                            | 1.106                       | 0.2694          | 0.6027                        | 0.860     |
| Nonanedioylcarnitine (C9:0-DC)     | 1.254                       | 0.2706          | 0.6027                        | 0.787     |
| Heptenoylcarnitine (C7:1)          | 1.515                       | 0.2752          | 0.6027                        | 1.611     |
| Leucylphenylalanine                | 1.333                       | 0.2792          | 0.6027                        | 0.484     |
| 5-Aminopentanamide                 | 1.212                       | 0.2797          | 0.6027                        | 0.702     |
| alpha-Ketoisovaleric acid          | 1.145                       | 0.2797          | 0.6027                        | 1.065     |
| Undec-enedioylcarnitine (C11:1-DC) | 1.273                       | 0.2944          | 0.6269                        | 1.476     |
| Styrene                            | 1.174                       | 0.3011          | 0.6320                        | 0.772     |
| Prolyl-Tyrosine                    | 1.235                       | 0.3038          | 0.6320                        | 0.522     |
| Creatinine                         | 1.089                       | 0.3244          | 0.6537                        | 0.594     |
| Hexenoylcarnitine (C6:1)           | 1.163                       | 0.3276          | 0.6537                        | 1.753     |
| Glutamine                          | 1.071                       | 0.3316          | 0.6537                        | 0.630     |
| Dodeca-trienoylcarnitine (C12:3)   | 1.202                       | 0.3328          | 0.6537                        | 0.990     |
| Decatrienoylcarnitine (C10:3)      | 1.185                       | 0.3377          | 0.6537                        | 0.620     |
| Tryptophan                         | 1.129                       | 0.3452          | 0.6537                        | 0.802     |
| Pipecolic acid                     | -1.140                      | 0.3462          | 0.6537                        | 0.336     |
| Arginylasparagine                  | 1.173                       | 0.3480          | 0.6537                        | 0.798     |
| Sphinganine                        | 1.044                       | 0.3495          | 0.6537                        | 0.898     |
| Creatine                           | -1.114                      | 0.3503          | 0.6537                        | 1.203     |
| Aspartyl-Serine                    | 1.181                       | 0.3673          | 0.6784                        | 0.537     |

| Metabolites with VIP>1                | Fold<br>Change <sup>1</sup> | <i>p</i> -value | FDR<br><i>q</i> -value at 15% | VIP Score |
|---------------------------------------|-----------------------------|-----------------|-------------------------------|-----------|
| Hexenoylcarnitine (C6:1)              | 1.331                       | 0.3735          | 0.6829                        | 0.460     |
| MethylHexadecanoylcarnitine (C16:0 M) | 1.074                       | 0.3953          | 0.7102                        | 0.588     |
| Oxoproline                            | 1.067                       | 0.3963          | 0.7102                        | 0.527     |
| Serylcysteine                         | 1.065                       | 0.4223          | 0.7494                        | 0.464     |
| Hydroxyheptanoylcarnitine (C7:0-OH)   | 1.197                       | 0.4287          | 0.7533                        | 0.887     |
| Arginylglutamine                      | 1.141                       | 0.4376          | 0.7605                        | 0.811     |
| Lactoylphenylalanine                  | 1.165                       | 0.4448          | 0.7605                        | 0.712     |
| Leucylalanine                         | 1.211                       | 0.4454          | 0.7605                        | 0.551     |
| Ribose                                | 1.079                       | 0.4718          | 0.7981                        | 0.730     |
| Serotonin                             | 1.209                       | 0.4789          | 0.8008                        | 0.523     |
| Phenol                                | 1.079                       | 0.4840          | 0.8008                        | 0.771     |
| Valerylglycine                        | 1.171                       | 0.4878          | 0.8008                        | 0.391     |
| Hydroxybutyrylcarnitine (C4:0-OH)     | 1.223                       | 0.4911          | 0.8008                        | 0.510     |
| Serylalanine                          | 1.118                       | 0.5038          | 0.8142                        | 1.096     |
| Octanedioylcarnitine (C8:0-DC)        | 1.194                       | 0.5094          | 0.8159                        | 0.875     |
| Leucylproline                         | 1.105                       | 0.5184          | 0.8178                        | 0.924     |
| Choline                               | 1.061                       | 0.5196          | 0.8178                        | 0.500     |
| Dec-enedioylcarnitine (C10:1-DC)      | 1.190                       | 0.5288          | 0.8251                        | 0.888     |
| Prolylproline                         | -1.110                      | 0.5697          | 0.8772                        | 0.582     |
| Salicylic acid                        | 1.110                       | 0.5762          | 0.8772                        | 0.834     |
| Deca-dienedioylcarnitine (C10:2-DC)   | 1.091                       | 0.5792          | 0.8772                        | 0.713     |
| Arginylmethionine                     | -1.133                      | 0.5816          | 0.8772                        | 1.231     |
| Tetradeca-trienoylcarnitine (C14:3)   | 1.102                       | 0.6069          | 0.9078                        | 0.910     |
| Glutamylvaline                        | 1.117                       | 0.6120          | 0.9080                        | 0.918     |
| Non-enoylcarnitine (C9:1)             | 1.059                       | 0.6219          | 0.9136                        | 1.185     |

| Metabolites with VIP>1                     | Fold Change <sup>1</sup> | <i>p</i> -value | FDR<br><i>q</i> -value at 15% | VIP Score |
|--------------------------------------------|--------------------------|-----------------|-------------------------------|-----------|
| N-Acetyl-Leu                               | -1.054                   | 0.6298          | 0.9136                        | 1.342     |
| Hexadeca-dienedioylcarnitine (C16:2-DC)    | 1.119                    | 0.6326          | 0.9136                        | 0.839     |
| Phenylpyruvic acid                         | 1.054                    | 0.6455          | 0.9136                        | 0.745     |
| Proline                                    | 1.039                    | 0.6547          | 0.9136                        | 0.560     |
| Tridecanoylcarnitine (C13:0)               | -1.198                   | 0.6547          | 0.9136                        | 1.547     |
| Homocysteine                               | 1.099                    | 0.6603          | 0.9136                        | 1.148     |
| Phenylacetylglutamine                      | 1.133                    | 0.6605          | 0.9136                        | 0.642     |
| Dodeca-dienedioylcarnitine (C12:2-DC)      | -1.160                   | 0.6612          | 0.9136                        | 1.212     |
| Kynurenine                                 | 1.064                    | 0.6909          | 0.9390                        | 0.913     |
| 4-Aminohippuric acid                       | 1.083                    | 0.6923          | 0.9390                        | 0.778     |
| Octa-dienoylcarnitine (C8:2)               | -1.077                   | 0.6952          | 0.9390                        | 0.924     |
| Undeca-dienoylcarnitine (C11:2)            | 1.106                    | 0.7105          | 0.9504                        | 0.938     |
| Methylheptanoylcarnitine (C7:0 M)          | 1.053                    | 0.7143          | 0.9504                        | 0.869     |
| Tetradec-enoylcarnitine (C14:1)            | -1.168                   | 0.7196          | 0.9504                        | 1.119     |
| Methylundecanoylcarnitine (C11:0 M)        | 1.090                    | 0.7252          | 0.9504                        | 0.661     |
| Methylnonanoylcarnitine (C9:0 M)           | 1.082                    | 0.7299          | 0.9504                        | 0.768     |
| Methionine                                 | 1.037                    | 0.7352          | 0.9505                        | 0.865     |
| Glutaric acid                              | 1.072                    | 0.7512          | 0.9643                        | 0.754     |
| Palmitoylcarnitine (C16:0)                 | 1.034                    | 0.7640          | 0.9738                        | 0.739     |
| Hydroxytrideca-dienoylcarnitine (C13:2-OH) | 1.097                    | 0.7695          | 0.9740                        | 1.356     |
| Valerylcarnitine (C5:0)                    | 1.044                    | 0.7892          | 0.9826                        | 0.871     |
| Hydroxypropionylcarnitine (C3:0-OH)        | -1.093                   | 0.7900          | 0.9826                        | 1.028     |
| Methyltetradecanoylcarnitine (C14:0 M)     | 1.027                    | 0.7973          | 0.9826                        | 1.646     |
| Threonylserine                             | 1.061                    | 0.8050          | 0.9826                        | 0.748     |

| Metabolites with VIP>1                    | Fold Change <sup>1</sup> | p-value | FDR<br>q-value at 15% | VIP Score |
|-------------------------------------------|--------------------------|---------|-----------------------|-----------|
| Valylleucine                              | 1.070                    | 0.8064  | 0.9826                | 0.460     |
| Dodeca-trienedioylcarnitine (C12:3-DC)    | -1.080                   | 0.8264  | 0.9826                | 1.098     |
| Butyrylcarnitine (4:0)                    | -1.037                   | 0.8321  | 0.9826                | 1.076     |
| Methyltridecanoylcarnitine (C13:0 M)      | 1.028                    | 0.8376  | 0.9826                | 1.262     |
| Threonine                                 | 1.013                    | 0.8543  | 0.9826                | 0.590     |
| Hydroxyhexadecanoylcarnitine (C16:0-OH)   | 1.040                    | 0.8563  | 0.9826                | 1.272     |
| Tridec-enedioylcarnitine (C13:1-DC)       | 1.039                    | 0.8595  | 0.9826                | 0.701     |
| Hydroxypentadecanoylcarnitine (C15:0-OH)  | -1.057                   | 0.8615  | 0.9826                | 0.719     |
| Glutaconic acid                           | 1.025                    | 0.8640  | 0.9826                | 1.288     |
| Phenylalanylmethionine                    | -1.061                   | 0.8649  | 0.9826                | 1.216     |
| Tetradeca-dienedioylcarnitine (C14:2-DC)  | 1.045                    | 0.8692  | 0.9826                | 0.839     |
| Glutamylthreonine                         | 1.039                    | 0.8725  | 0.9826                | 0.879     |
| Phenylalanylglycine                       | 1.024                    | 0.8929  | 0.9826                | 1.210     |
| Hydroxydodeca-dienoylcarnitine (C12:2-OH) | 1.027                    | 0.8961  | 0.9826                | 0.815     |
| Glycerophosphocholine                     | 1.014                    | 0.8971  | 0.9826                | 0.455     |
| Succinylcarnitine (C4:0-DC)               | 1.024                    | 0.8974  | 0.9826                | 0.938     |
| Caprylic acid                             | 1.024                    | 0.8994  | 0.9826                | 0.708     |
| Glutaryl carnitine (C5:0-DC)              | 1.026                    | 0.9012  | 0.9826                | 0.759     |
| Nona-dienedioylcarnitine (C9:2-DC)        | 1.021                    | 0.9062  | 0.9826                | 0.880     |
| Acetylcholine                             | -1.010                   | 0.9143  | 0.9826                | 0.935     |
| Arginyllysine                             | 1.026                    | 0.9174  | 0.9826                | 0.764     |
| Biotin                                    | 1.022                    | 0.9223  | 0.9826                | 1.527     |
| Prolylglycine                             | 1.018                    | 0.9229  | 0.9826                | 0.762     |

| Metabolites with VIP>1                    | Fold Change <sup>1</sup> | <i>p</i> -value | FDR<br><i>q</i> -value at 15% | VIP Score |
|-------------------------------------------|--------------------------|-----------------|-------------------------------|-----------|
| Serylglycine                              | 1.012                    | 0.9351          | 0.9891                        | 0.689     |
| Glutamylproline                           | 1.014                    | 0.9463          | 0.9891                        | 1.060     |
| Alanyltyrosine                            | 1.018                    | 0.9498          | 0.9891                        | 0.971     |
| Pyridoxamine                              | -1.012                   | 0.9513          | 0.9891                        | 0.866     |
| Hepta-dienoylcarnitine (C7:2)             | -1.007                   | 0.9657          | 0.9891                        | 0.668     |
| Arginine                                  | 1.003                    | 0.9722          | 0.9891                        | 0.472     |
| Tetradeca-trienedioylcarnitine (C14:3-DC) | -1.003                   | 0.9751          | 0.9891                        | 0.943     |
| Tetradec-enedioylcarnitine (C14:1-DC)     | -1.007                   | 0.9755          | 0.9891                        | 0.793     |
| Lysine                                    | 1.003                    | 0.9818          | 0.9891                        | 1.070     |
| Histidine                                 | 1.003                    | 0.9836          | 0.9891                        | 0.765     |
| Octadec-enedioylcarnitine (C18:1-DC)      | 1.002                    | 0.9956          | 0.9956                        | 0.744     |

<sup>1</sup>Fold change = Mean Term signal with respect to mean Preterm Signal
